# Supplementary material for: Reconstitution of the complete pathway of ITS2 processing at the pre-ribosome
Source: Nat Commun. 2017 Nov 27;8:1787. doi: 10.1038/s41467-017-01786-9 (PMC5702609; doi:10.1038/s41467-017-01786-9)

## SUPPLEMENTARY INFORMATION

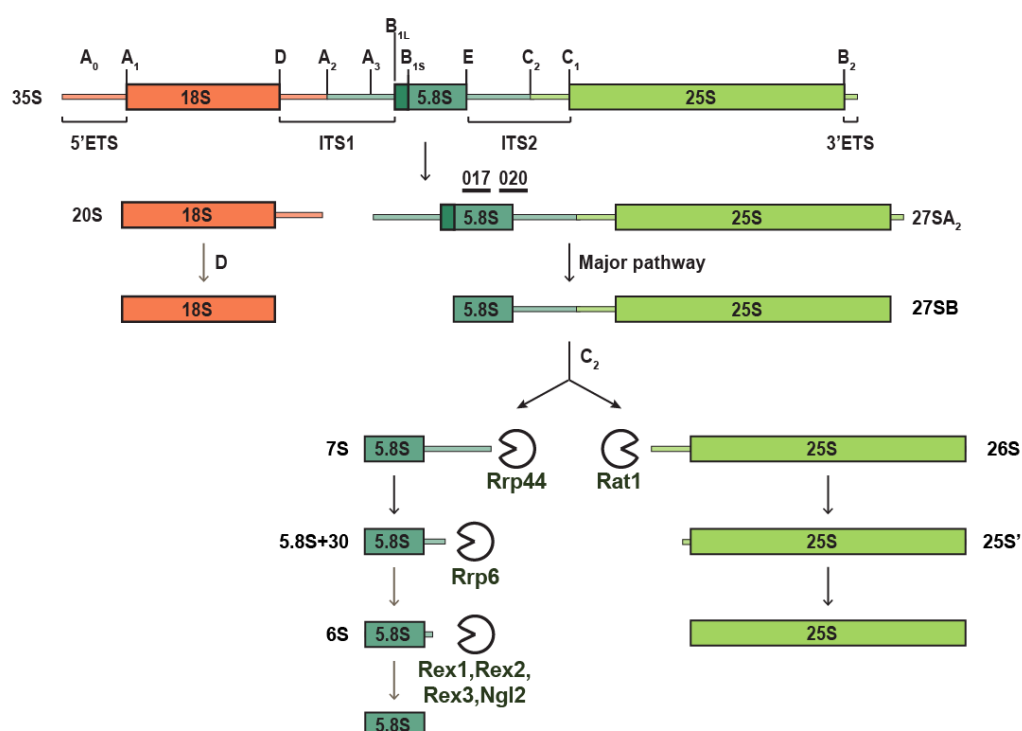

**Supplementary Figure 1** Scheme depicting processing of yeast 35S pre-rRNA to yield mature 5.8S and 25S rRNA. The 35S precursor consists of a 5' external transcribed spacer (5'ETS), 18S rRNA, internal transcribed spacer 1 (ITS1), 5.8S rRNA, internal transcribed spacer 2 (ITS2), 25S rRNA and 3' external transcribed spacer (3'ETS). The cleavage sites within the 35S pre-rRNA are indicated. For 5.8S rRNA maturation, only the major pathway is depicted (5.8S<sub>S</sub> as opposed to 5.8S<sub>L</sub>), but the removal of ITS2 is the same in both cases. 27SB pre-rRNA is cleaved at site C<sub>2</sub> by the Las1 endonuclease. The resulting cleaved products, 7S and 26S pre-rRNA, are further processed through different intermediates (5.8S+30, and 6S or 25S' pre-rRNA) to yield mature 5.8S and 25S rRNA (7S→5.8S versus 26S→25S pre-rRNA processing). The different ribonucleases involved are indicated at their respective processing steps. 7S pre-rRNA is processed by the Rrp44 exosome subunit until the 5.8S+30 intermediate, which is processed by the other nucleolytic exosome subunit, Rrp6, to yield 6S pre-rRNA that is only extended by eight nucleotides relative to the mature 5.8S rRNA. These eight nucleotides are removed after nuclear export by cytoplasmic exonucleases.

The 26S pre-rRNA is processed by Rat1 5'→3' exonuclease to 25S rRNA via a 25S' intermediate. Above the 27SA<sub>2</sub> pre-rRNA the location of the probes used for detection in the northern blots is indicated.

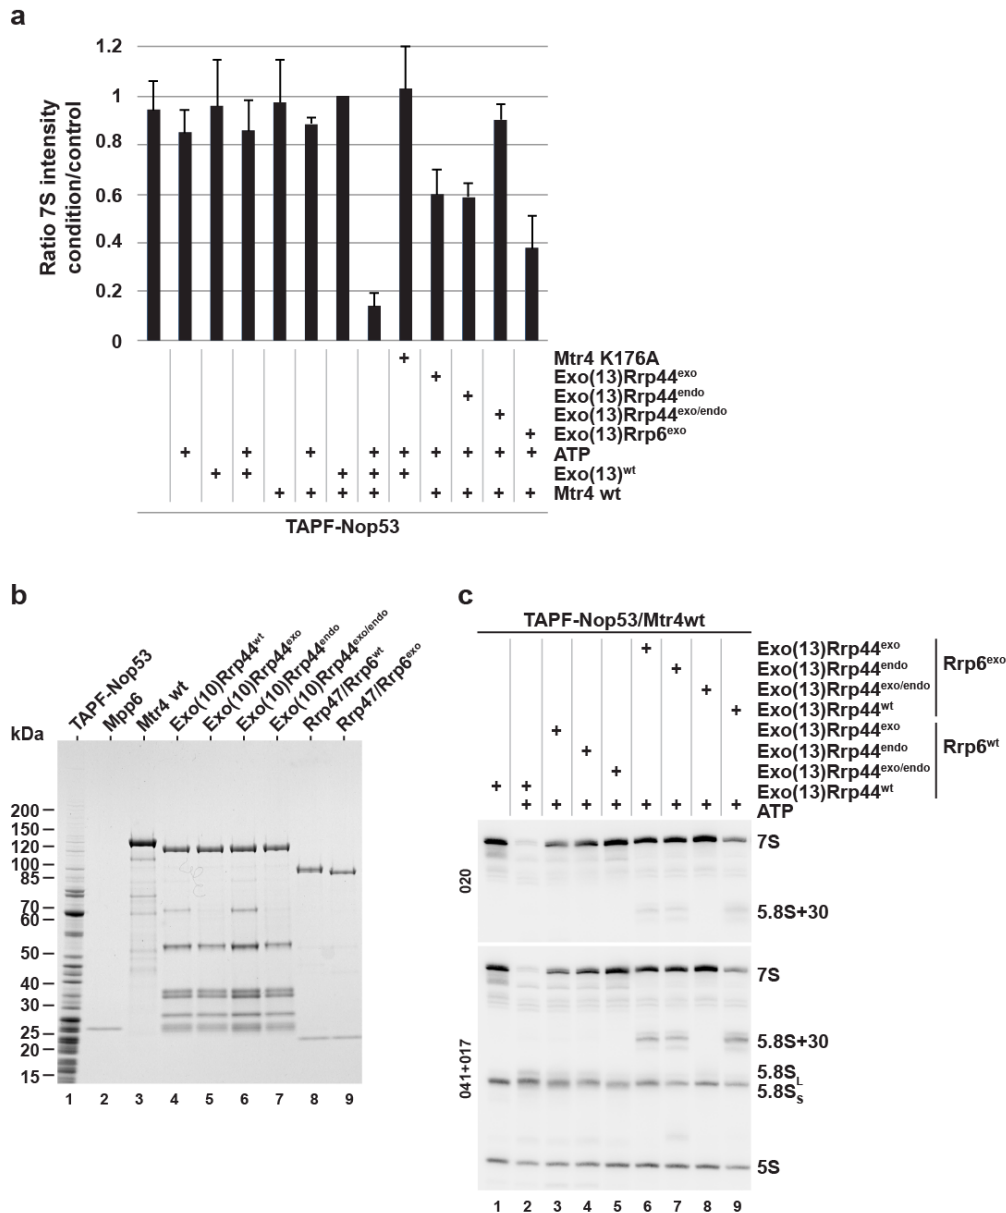

**Supplementary Figure 2** Pre-rRNA maturation in the context of the *in vitro* 7S→5.8S pre-rRNA processing assay using wt or mutant exosome. **(a)** Quantification of 7S pre-rRNA bands in **Figure 2b** and two more experiments (n=3). Background was subtracted and bands were normalized to 5S rRNA levels. 7S levels of the condition with all necessary factors but without ATP (control) were set to one. Error bars correspond to one standard deviation. **(b)** SDS-PAGE and Coomassie staining of the protein samples used for *in vitro* 7S→5.8S pre-rRNA processing shown in **(c)**. Pre-60S particles containing 7S substrate pre-rRNA were affinity-purified via TAPF-Nop53. All the yeast exosome subunits and Mtr4 were expressed recombinantly in *E. coli* and

subsequently purified from cell lysates. **(b)** Northern blot for the detection of 7S pre-rRNA, 5.8S rRNA and 5S rRNA species after the *in vitro* processing reaction. Processing of 7S pre-rRNA from pre-60S particles (TAPF-Nop53) using the recombinantly purified exosome (Exo(13)) and its cofactor Mtr4, either the wt (wt) or K176A mutant, in the presence or absence of ATP. Exo(13) was used combining mutations in Rrp44 with the Rrp6 wt or the Rrp6 exonucleolytic mutant. 7S pre-rRNA was detected with two different probes. 5S rRNA served as a loading control.

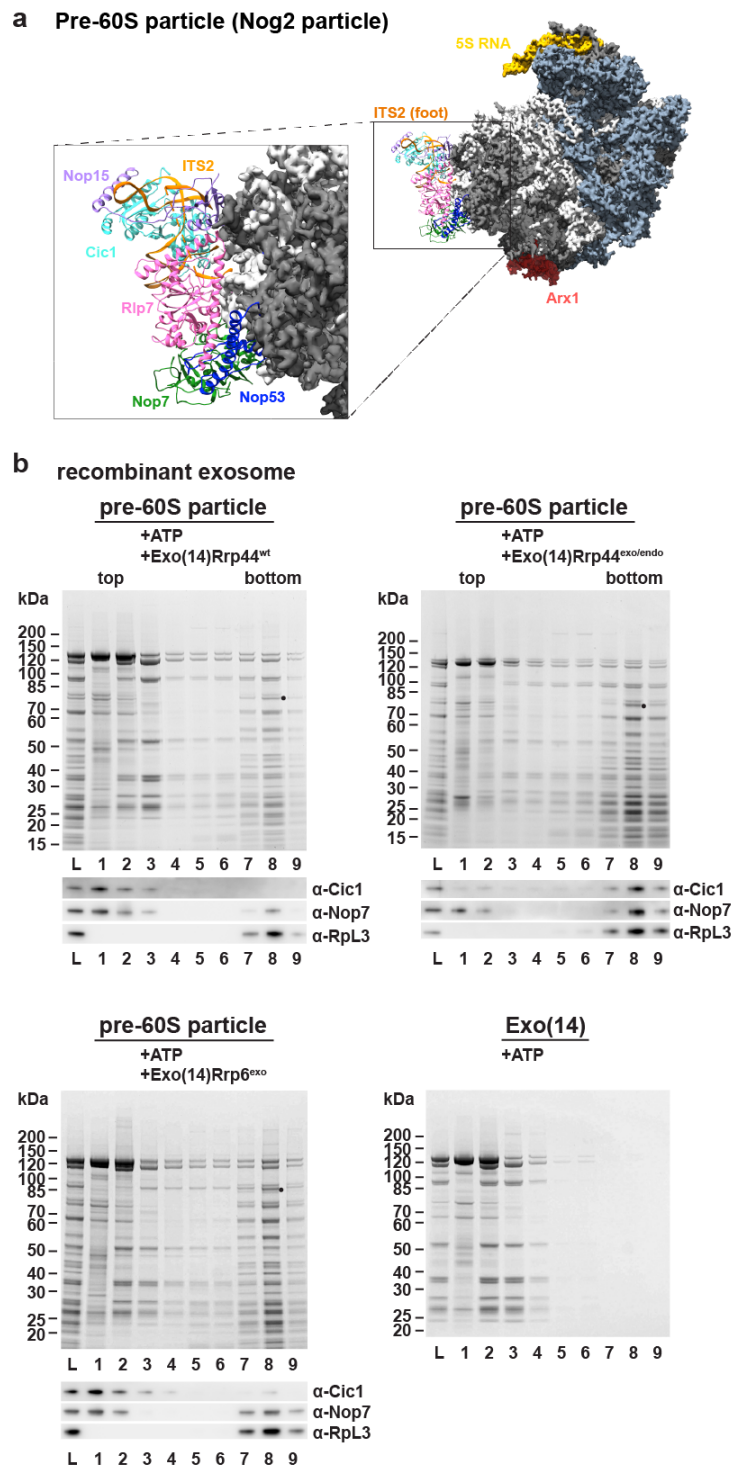

**Supplementary Figure 3** Analysis of pre-60S particles incubated with recombinant exosome reveals release of ITS2 associated factors after *in vitro* 7S→5.8S pre-rRNA processing. (a) Published cryo-EM structure of the Nog2-derived pre-60S ribosomal particle (Wu et al., 2016) indicating details of the prominent "foot" structure. Shown are: r-proteins (dark grey), 25S and 5.8S rRNA (light grey), Arx1 (red), 5S rRNA (yellow), part of ITS2 (orange), Nop15

(purple), Cic1 (cyan), Rlp7 (pink), Nop7 (green), Nop53 (blue), residual ribosome biogenesis factors (blue-grey). **(b)** Glycerol gradient centrifugation of recombinantly expressed (in *E. coli*) exosome (Exo14) and Nop53-derived pre-60S particles incubated with the indicated reagents (ATP, Exo14). Gradient fractions were collected, precipitated by TCA and analysed by SDS-PAGE and Coomassie staining (upper panels) or by western blotting using the indicated antibodies (lower panels). Results are shown for a pre-60S particle incubated with recombinant exosome containing all wt components (upper left) or mutant components in the presence of ATP (upper right: Rrp44 double mutant; lower left: Rrp6 exonuclease mutant). Exo(14) includes all components of the nuclear exosome: the core, the exonucleases and cofactors, as well as Mtr4. Fractions (7–9) contained the pre-60S particles, whereas the top fractions (1 and 2) contained the released factors such as Cic1 and Nop7. Fractions 2–4 contained exosome. Ribosome assembly factor Nog1 not released during the *in vitro* reaction is indicated by a dot (fraction 8).

**a** pre-60S particle (TAPF-Nop53)

+ATP

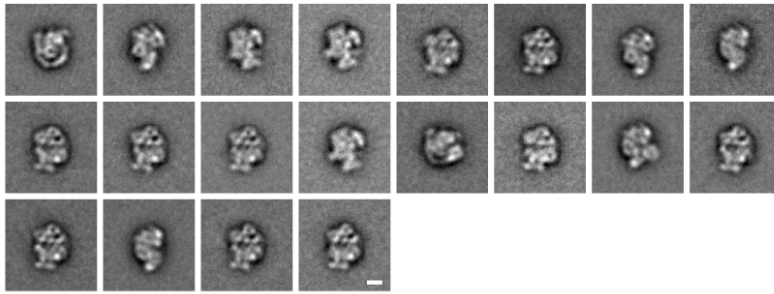

**b** pre-60S particle (TAPF-Nop53)

+ATP

+exosome (Rrp6-TAP)

+Mtr4

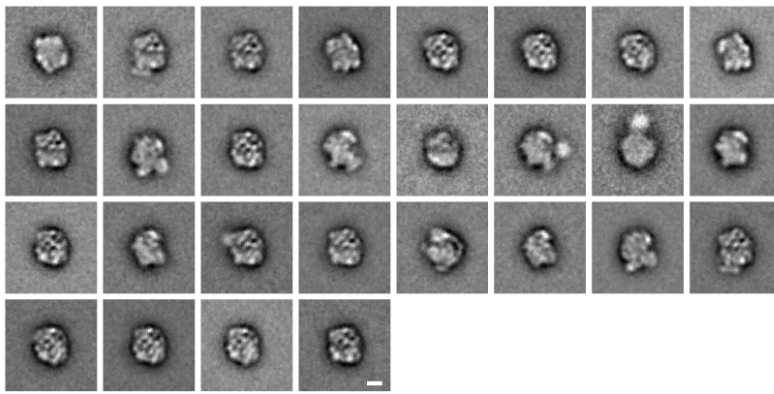

**c** pre-60S particle (TAPF-Nop53)

+ATP

+exosome (Rrp6-TAP)

+Mtr4 K176A

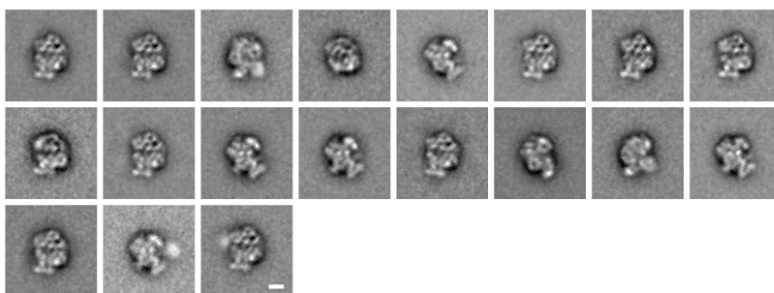

**Supplementary Figure 4** Detection of “foot” structure removal from pre-60S particles (related to to **Figure 4**). Negative-stain EM 2D averages of pre-60S particles (affinity-purified via TAPF-Nop53) after the *in vitro* processing reaction. **(a)** pre-60S particles treated with only ATP as a control (mock). Averages of 3908 particles are shown. **(b)** pre-60S particles treated with endogenous yeast exosome (affinity-purified via Rrp6-FTpA) and recombinant wt Mtr4 in the presence of ATP. Averages of 4414 particles are shown. **(c)** pre-60S particles treated with endogenous yeast exosome (affinity-purified via

Rrp6-FTpA) and recombinant mutant Mtr4 (K176A) in the presence of ATP. Averages of 3870 particles are shown. The pre-60S particles shown were derived from fraction 8 of the glycerol gradient (**Fig. 3a**). The scale bars represent 10 nm.

**Supplementary Table 1** Yeast strains used in this study

| Name                  | Genotype                                                                                                                                                               | Source                     |
|-----------------------|------------------------------------------------------------------------------------------------------------------------------------------------------------------------|----------------------------|
| W303                  | <i>Mat<math>\alpha</math></i> , <i>ade2-1</i> , <i>ura3-1</i> , <i>leu2-3,112</i> , <i>his3-11,15</i> , <i>trp1-1</i> , <i>can1-100</i>                                | Thomas and Rothstein, 1989 |
| TAP-Flag-Nop53        | W303, <i>Mat<math>\alpha</math></i> , <i>P<sub>NOP53</sub><sup>-</sup></i><br><i>TAP-Flag-NOP53::natNT2</i>                                                            | Thoms et al., 2015         |
| Rrp6-TAP              | W303, <i>Mat<math>\alpha</math></i> , <i>RRP6-FTpA::natNT2</i>                                                                                                         | Gasse et al., 2015         |
| Rsa4-TAP/<br>Las1-AID | W303, <i>Mat<math>\alpha</math></i> , <i>P<sub>ADH1</sub><sup>-</sup></i><br><i>OsTIR1-9xmyc::Trp1</i> ,<br><i>TAP-Flag-RSA4::natNT2</i> , <i>LAS1-HA-AID::His3MX6</i> | Gasse et al., 2015         |

**Supplementary Table 2** Plasmids used in this study

| Name                                                        | Features                                                                                                                  | Source             |
|-------------------------------------------------------------|---------------------------------------------------------------------------------------------------------------------------|--------------------|
| pET21d-His-TEV-Mtr4                                         | <i>AmpR</i> , <i>6xHis-TEV-Mtr4</i>                                                                                       | This study         |
| pET21d-His-TEV-Mtr4<br>K176A                                | <i>AmpR</i> , <i>6xHis-TEV-Mtr4</i><br><i>K176A</i>                                                                       | This study         |
| YEplac112-P2-Las1-<br>TpA-p.Gal1-10-P1-Flag-<br>Grc3        | <i>2<math>\mu</math></i> , <i>TRP1</i> , <i>P2-LAS1-</i><br><i>TpA-P<sub>GAL1-10</sub>-P1-Flag-</i><br><i>Grc3</i>        | Gasse et al., 2015 |
| YEplac112-P2-Las1-<br>TpA-p.Gal1-10-P1-Flag-<br>Grc3(K252A) | <i>2<math>\mu</math></i> , <i>TRP1</i> , <i>P2-LAS1-</i><br><i>TpA-P<sub>GAL1-10</sub>-P1-Flag-</i><br><i>Grc3(K252A)</i> | Gasse et al., 2015 |
| YEplac181-P2-Rat1-<br>p.Gal 1-10-P1-Rai1                    | <i>2<math>\mu</math></i> , <i>LEU2</i> , <i>P2-Rat1-</i><br><i>P<sub>GAL1-10</sub>-P1-Rai1</i>                            | Gasse et al., 2015 |

**Supplementary Table 3** LFQ intensity values of fractions 8 of two experiments normalized to Nog1 (filtered for ribosomal proteins, contaminations and exosome components and cofactors)

|             | Experiment 1     |                     |                    | Experiment 2     |                     |                    |
|-------------|------------------|---------------------|--------------------|------------------|---------------------|--------------------|
| Protein IDs | LFQ intensity wt | LFQ intensity Rrp44 | LFQ intensity Rrp6 | LFQ intensity wt | LFQ intensity Rrp44 | LFQ intensity Rrp6 |
| Cic1        | 155540000        | 1271726242          | 296606391.8        | 617450000        | 5906540191          | 1543663069         |
| Nop2        | 26340000         | 162218082.9         | 36305954.21        | 195130000        | 775687561.3         | 205926273.6        |
| Rlp7        | 229290000        | 1151957424          | 311031247.3        | 1261100000       | 6436868387          | 2460270181         |
| Nop15       | 45031000         | 209770601.4         | 67193189.44        | 140250000        | 1007385757          | 384648327.5        |
| Spb1        | 41179000         | 150540156           | 35384396.06        | 147620000        | 383754678.1         | 82485493.64        |
| Nop53       | 835430000        | 1653711232          | 1281373983         | 3281600000       | 8047010322          | 7217219366         |
| Nop7        | 911070000        | 1668308641          | 1473311561         | 5507000000       | 9083885180          | 9121253413         |
| Bud20       | 169360000        | 235789022.6         | 217113945.5        | 2920600000       | 2523484938          | 2942419895         |
| Nsa2        | 739210000        | 758025914.7         | 824987881.5        | 4486400000       | 3740703092          | 4190651933         |
| Nog2        | 2144300000       | 2149439230          | 2135480095         | 14666000000      | 13714017623         | 17920551028        |
| Nog1        | 2627300000       | 2627300000          | 2627300000         | 12250000000      | 12250000000         | 12250000000        |
| Nug1        | 2089100000       | 2010004783          | 2155565337         | 10265000000      | 9634559799          | 12467032703        |
| Mrt4        | 973590000        | 930497217.5         | 967904580.8        | 6435600000       | 6034564113          | 6683588083         |
| Arx1        | 3707400000       | 3534441364          | 4242282331         | 21152000000      | 20244690948         | 23715494069        |
| Ipi3        | 715710000        | 678814536.4         | 824998622.3        | 4053000000       | 3189103636          | 3987861592         |
| Tif6        | 396410000        | 374219168.4         | 457771661          | 3704700000       | 3336813382          | 4539132499         |
| Alb1        | 250040000        | 227637829.6         | 212409487.8        | 2143500000       | 1828535683          | 2823777093         |
| Rsa4        | 1586600000       | 1423422513          | 1689523282         | 9062500000       | 8177544516          | 9514682353         |
| Ipi1        | 154340000        | 135522342           | 135913716.5        | 979800000        | 935552314           | 1090690599         |
| Rix1        | 935770000        | 730150703.2         | 964456793.3        | 4244900000       | 3443169685          | 4231288399         |
| Rrs1        | 240590000        | 183273385.2         | 249637000.1        | 1744000000       | 1564824901          | 1666225787         |
| Sda1        | 750480000        | 559010684.1         | 791261860.5        | 4046100000       | 3390850311          | 3614162898         |
| Rpf2        | 412340000        | 231433155.8         | 407375963.4        | 1649900000       | 1502728675          | 1907169980         |



related to Fig. 3 a

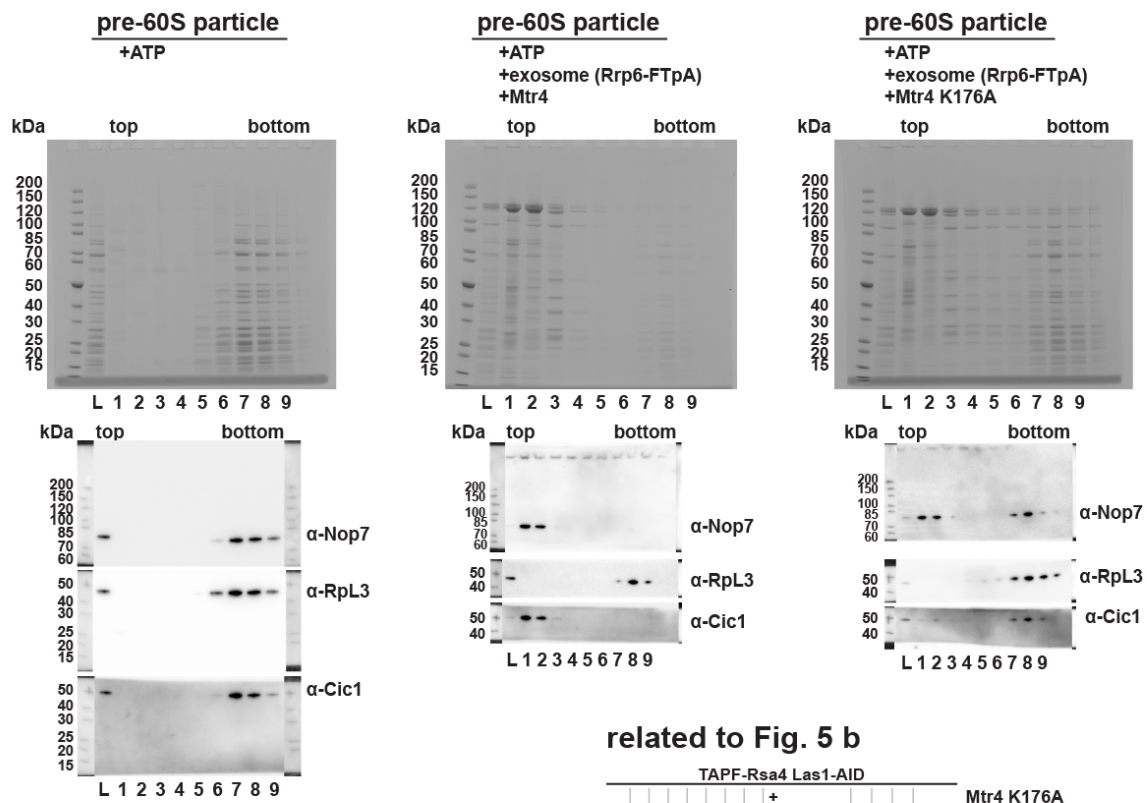

related to Fig. 5 a

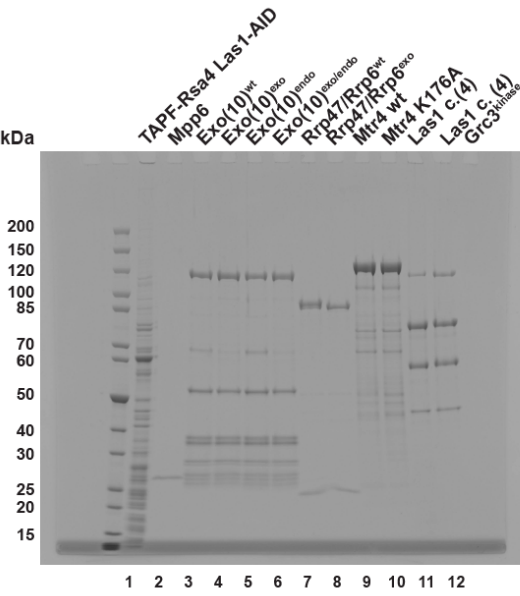

related to Fig. 5 b

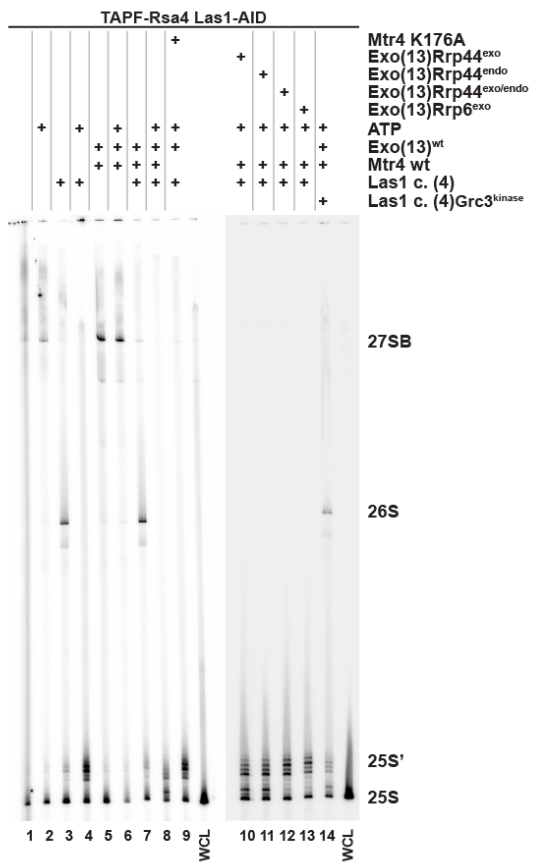

related to Fig. 5 c

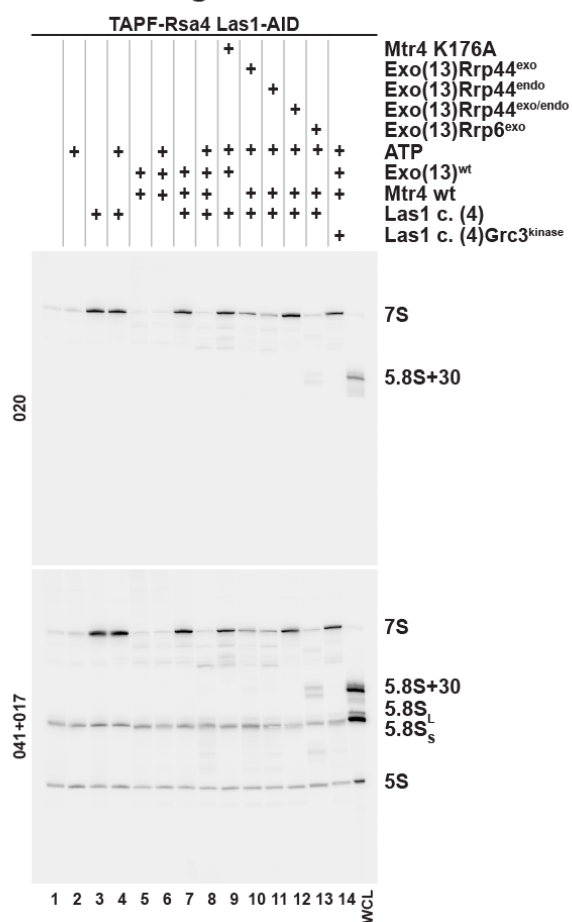

Supplement: Supplementary file 1 — Supplementary Information [file 41467_2017_1786_MOESM1_ESM.pdf]
